# Supplementary material for: Cyan Fluorescent Carbon Quantum Dots with Amino Derivatives for the Visual Detection of Copper (II) Cations in Sea Water
Source: MDPI journal article supplement (doi:10.3390/nano13061004), 2023-03-10
Supplement: s1 [file s1]

Supplementary materials

# Cyan Fluorescent Carbon Quantum Dots with Amino Derivatives for the Visual Detection of Copper (II) Cations in Sea Water

Yakusheva Anastasia <sup>1,\*</sup>, Aly-Eldeen Mohamed <sup>2</sup>, Gusev Alexander <sup>1,3</sup>, Zakharova Olga <sup>1,3</sup> and Denis Kuznetsov <sup>1</sup>

<sup>1</sup> Department of Functional Nanosystems and High-Temperature Materials, National University of Science and Technology MISIS, Leninsky Prospekt 4, 119049 Moscow, Russia; nanosecurity@mail.ru (G.A.); olgazakharova1@mail.ru (Z.O.); dk@misis.ru (D.K.)

<sup>2</sup> Marine Chemistry Laboratory, National Institute of Oceanography & Fisheries, Kayet-Bey, Al-Anfoushi, 5321430 Alexandria, Egypt; ~~ma.aly-eldeen@niof.sci.eg~~ m\_niof@yahoo.com

<sup>3</sup> Research Institute for Environmental Science and Biotechnology, Derzhavin Tambov State University, 33, Internatsionalnaya str., 392000 Tambov, Russia; nanosecurity@mail.ru (G.A.); olgazakharova1@mail.ru (Z.O.)

\* Correspondence: yakusheva.as@misis.ru; Tel.: +7-909-669-3081

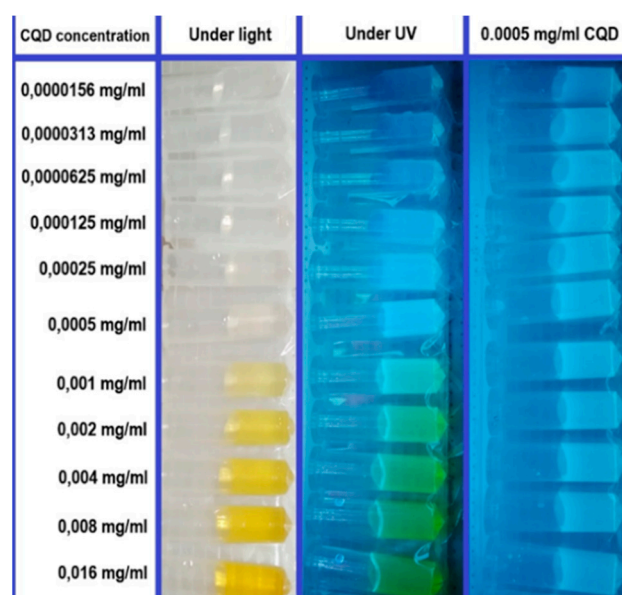

**Figure S1.** The calibration range of Amino-CQD dispersion under UV irradiation for the visual sensing.

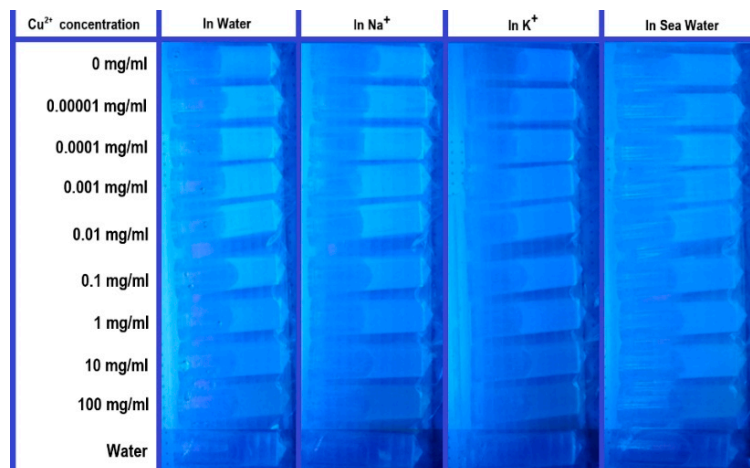

**Figure S2.** The visualization of Amino-CQD quenching effect by  $\text{Cu}^{2+}$  cation under UV light.

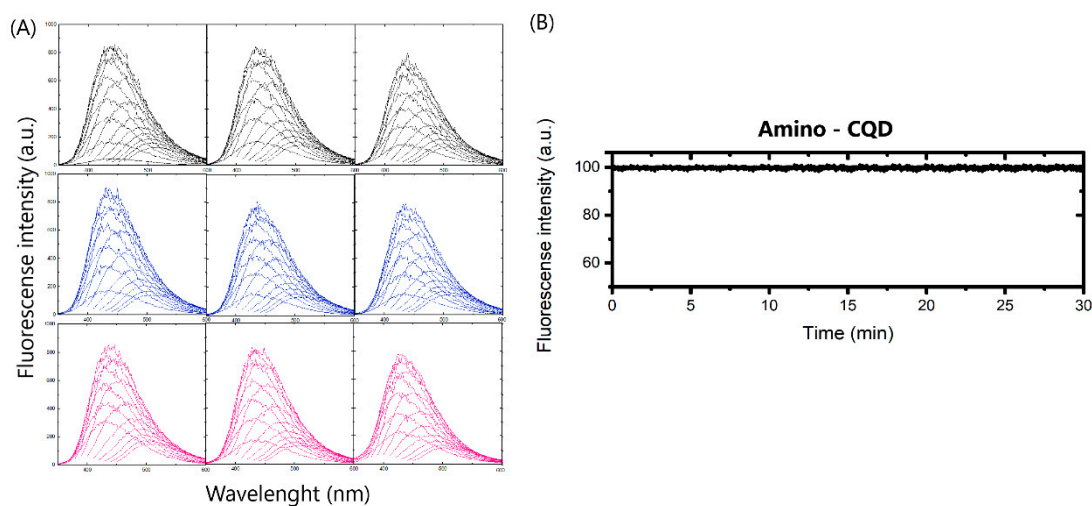

**Figure S3** The reproducibility and stability of fluorescence properties.

**Table S1.** The polarization fluorescence analysis of Amino - CQD sample in different ionic solution.

| Sample                                      | Polarization of Fluorescence (a.u.) |
|---------------------------------------------|-------------------------------------|
| Amino-CQD                                   | $42.6 \pm 0.2$                      |
| Amino-CQD + $\text{Cu}^{2+}$                | $181.1 \pm 1.8$                     |
| Amino - CQD in NaCl                         | $46.9 \pm 0.3$                      |
| Amino - CQD in KCl                          | $47.55 \pm 0.2$                     |
| Amino - CQD in Sea Water                    | $49.8 \pm 0.3$                      |
| Amino - CQD in NaCl + $\text{Cu}^{2+}$      | $183.6 \pm 1.8$                     |
| Amino - CQD in KCl + $\text{Cu}^{2+}$       | $187.9 \pm 1.8$                     |
| Amino - CQD in Sea Water + $\text{Cu}^{2+}$ | $193.4 \pm 1.8$                     |

**Table S2.** The lineal fitting results for the fluorescence quenching by  $\text{Cu}^{2+}$  and the calibration curves for visual test.

| <b>Stern -Volmer coefficient for the quenching effect in Amino-CQD</b>                  |                 |                 |                 |                     |
|-----------------------------------------------------------------------------------------|-----------------|-----------------|-----------------|---------------------|
|                                                                                         | <b>In Water</b> | <b>In Na+</b>   | <b>In K+</b>    | <b>In Sea Water</b> |
| Intercept                                                                               | 0,120 ± 0,003   | 0,121 ± 0,007   | 0,121 ± 0,001   | 0,120 ± 0,007       |
| Slope                                                                                   | 0,028 ± 0,001   | 0,029 ± 0,003   | 0,028 ± 0,001   | 0,029 ± 0,003       |
| R <sup>2</sup>                                                                          | 0,992           | 0,993           | 0,998           | 0,996               |
| <b>The coefficient for the calibration curves by Green color reduction in Amino-CQD</b> |                 |                 |                 |                     |
|                                                                                         | <b>In Water</b> | <b>In Na+</b>   | <b>In K+</b>    | <b>In Sea Water</b> |
| Intercept                                                                               | 134,178 ± 4,432 | 130,464 ± 3,875 | 123,964 ± 2,200 | 124,607 ± 3,658     |
| Slope                                                                                   | -11,214 ± 1,618 | -6,857 ± 1,415  | -4,940 ± 0,803  | -10,928 ± 1,335     |
| R <sup>2</sup>                                                                          | 0,988           | 0,970           | 0,977           | 0,986               |
